# Supplementary material for: Comparison of de novo assembly using long-read shotgun metagenomic sequencing of viruses in fecal and serum samples from marine mammals
Source: Front Microbiol. 2023 Sep 22;14:1248323. doi: 10.3389/fmicb.2023.1248323 (PMC10556685; doi:10.3389/fmicb.2023.1248323)
Supplement: Supplementary file 1 [file Table_1.XLSX]

## Sheet: Sheet1
Virus Family	Genome Type	Morphology	Genome Size (kb)
Ackermannviridae	dsDNA, linear	non-enveloped	155
Alphasatellitidae	ssDNA, circular	satellite virus	1.3
Anelloviridae	ssDNA, circular	non-enveloped	3.8
Autographiviridae	dsDNA, linear	non-enveloped	40-42
Baculoviridae	dsDNA, circular	Enveloped	80-180
Caudovirales (Order)	dsDNA, linear	non-enveloped	16-20
Inoviridae	ssDNA, circular	non-enveloped	4.5-8
Iridoviridae	dsDNA,linear	non-enveloped or enveloped	140-303
Lilyvirus (unassigned)	dsDNA, linear	non-enveloped	N/A
Marseilleviridae	dsDNA,circular	non-enveloped	372
Microviridae	ssDNA, circular	non-enveloped	4.4-6.1
Mimiviridae	dsDNA, linear	non-enveloped	1200
Myoviridae	dsDNA, linear	non-enveloped	33-244
Parvoviridae	ssDNA,linear	non-enveloped	4.0-6.0
Phycodnaviridae	dsDNA, linear	Enveloped	100-560
Podoviridae	dsDNA,linear	non-enveloped	40-42
Poxviridae	dsDNA,linear	Enveloped	130-375
Riboviria (Realm)	RNA	N/A	N/A
Salasmaviridae	dsDNA, linear	non-enveloped	16-20
Siphoviridae	dsDNA, linear	non-enveloped	50
Smacoviridae	ssDNA,circular	unassigned	2.3-2.8
Tectiviridae	dsDNA, linear	non-enveloped	15
Unclassified RNA viruses ShiM-2016	RNA	unassigned	unassigned
Zobellviridae	dsDNA,linear	unassigned	unassigned
